# Supplementary material
Source: publisher figshare collection journal article supplement (https://acs.figshare.com/ndownloader/files/3963901)
Supplement: Supplementary file 1 [file 3963901]

## Supporting Information

Production rate and reactivity of singlet oxygen  $^1\text{O}_2 (^1\Delta_g)$  directly photoactivated at 1270 nm in lipid nanocapsules dispersed in water

*A. Sivéry<sup>†</sup>, A. Barras<sup>‡</sup>, R. Boukherroub<sup>‡</sup>, C. Pierlot<sup>¶</sup>, J.M. Aubry<sup>¶</sup>, F. Anquez<sup>†</sup> and E. Courtade<sup>\*†</sup>*

*<sup>†</sup>Laboratoire de Physique des Lasers, Atomes et Molécules, UMR 8523- Université Lille1, 59655 Villeneuve d'Ascq, France*

*<sup>‡</sup>Institut de Recherche Interdisciplinaire (IRI, USR CNRS 3078), Université Lille 1, Parc de la Haute Borne, 50 Avenue de Halley, BP 70478, 59658 Villeneuve d'Ascq, France*

*<sup>¶</sup>Laboratoire de Chimie Moléculaire et Formulation, EA-CMF 4478- ENSCL et Université Lille 1, 59655 Villeneuve d'Ascq, France*

*\*To whom correspondence should be addressed: [emmanuel.courtade@univ-lille1.fr](mailto:emmanuel.courtade@univ-lille1.fr)*

## Part A-Lipid nanocapsules dispersions in D<sub>2</sub>O and H<sub>2</sub>O

### I- DPIBF consumption rate in lipid nanocapsules dispersions in D<sub>2</sub>O and H<sub>2</sub>O

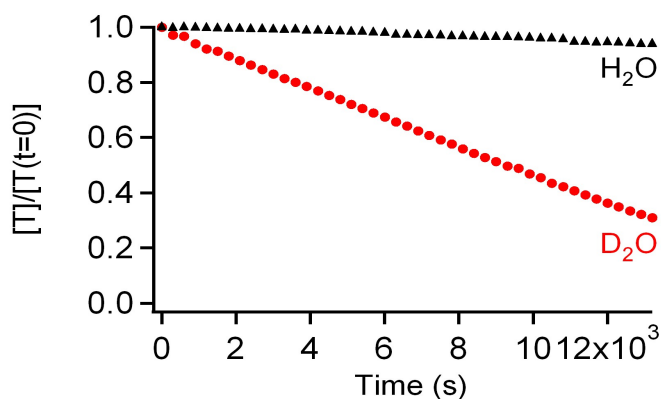

Fig S0. Normalized concentration of DPIBF-loaded LNCs upon 1270 nm irradiation at 1.2 W, for  $f_{LNC}=0.0017$  in H<sub>2</sub>O (black triangles) and D<sub>2</sub>O (red circles). The slopes of the curve  $\Gamma_{app}/([T_0] + \beta_{app})$  are  $7.6 \times 10^{-6} \text{ s}^{-1}$  and  $5.3 \times 10^{-5} \text{ s}^{-1}$  in H<sub>2</sub>O and D<sub>2</sub>O, respectively. DPIBF initial concentration is  $140 \times 10^{-6} \text{ mol.L}^{-1}$  and  $120 \times 10^{-6} \text{ mol.L}^{-1}$ , and dissolved oxygen concentration is  $2.04 \times 10^{-4} \text{ mol.L}^{-1}$  and  $2.46 \times 10^{-4} \text{ mol.L}^{-1}$  in H<sub>2</sub>O and D<sub>2</sub>O, respectively. Normalized to the same 1270 nm photons flux and considering  $\sigma_{d2o} = \sigma_{h2o}$ ,  $k_{r,LNC} = 2.44 \times 10^8 \text{ M}^{-1} \cdot \text{s}^{-1}$ ,  $k_{d,LNC} = 2.56 \times 10^5 \text{ s}^{-1}$  and singlet oxygen lifetime in H<sub>2</sub>O and D<sub>2</sub>O, the ratio of the two slopes is  $\sim 4.4$  compared to a theoretical value of 4 (see Eq. 1) .

$$\frac{[^3O_2]_{d2o}}{[^3O_2]_{h2o}} \times \frac{[T_0]_{h2o} + \beta_{app,h2o}}{[T_0]_{d2o} + \beta_{app,d2o}} \quad \text{Eq. 1}$$

### II-Effect of 1270 nm irradiation on LNCs

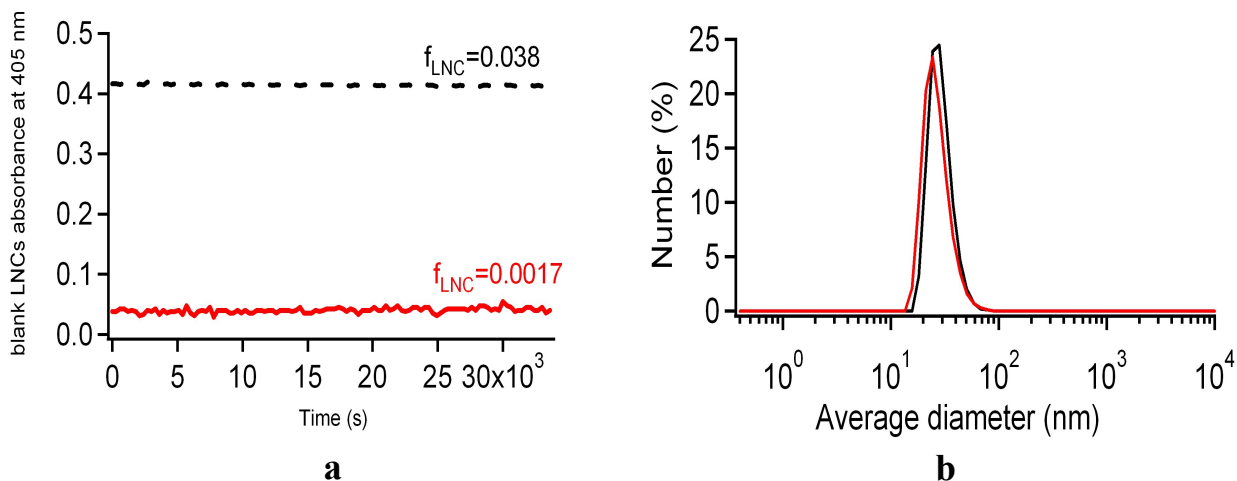

Fig S1. **(a)** Blank LNCs absorbance at 405 nm upon 1270 nm irradiation. Blank LNCs dispersed in D<sub>2</sub>O have been irradiated at 1270 nm at a power of 1.0 W for  $f_{LNC}=0.0017$  (red straight line) and  $f_{LNC}=0.038$  (black dashed line). No decrease of absorbance is observed for the lower and upper range of  $f_{LNC}$ . **(b)** Average diameter of DPIBF-loaded LNCs in D<sub>2</sub>O ( $[T_0]=120 \times 10^{-6} \text{ mol.L}^{-1}$ ,  $f_{LNC}=0.0017$ ) before (black line) and after (red line) 8 h 1270 nm irradiation at 1.0 W. Measurements have been performed using dynamic light scattering with a Zetasizer® Nano ZS (Malvern Instrument S.A., Worcestershire, U.K). LNCs average diameters are quite identical before and after irradiation.

### III-Formation of two oxidation products during 1270 nm irradiation

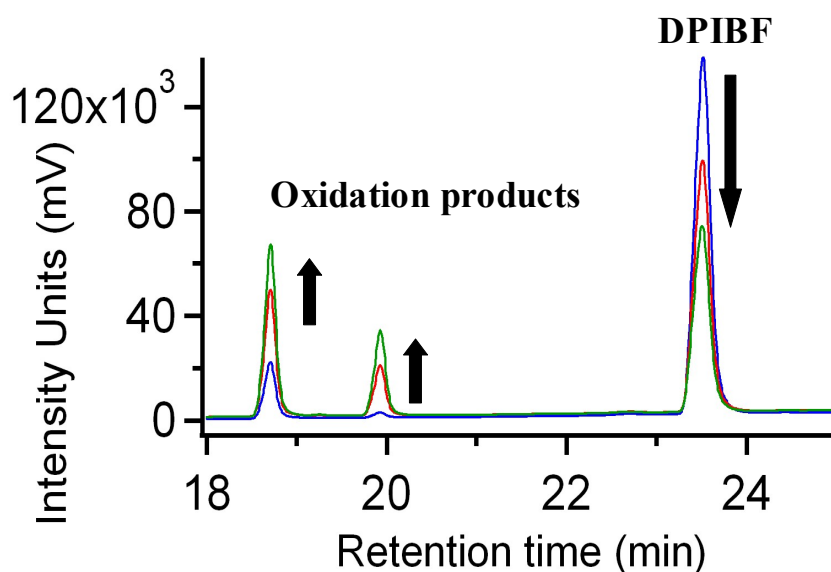

Fig S2. HPLC chromatograms of DPIBF-loaded LNCs in  $D_2O$  with  $[T_0]=120 \times 10^{-6} \text{ mol.L}^{-1}$  for  $f_{LNC}=0.006$  before and after 1270 nm irradiation at 1.0 W (detection at 215 nm). Non irradiated (blue line), 1 h (red line) and 2 h (green line) irradiated dispersions have been analysed. 28 % and 47% of DPIBF is degraded for 1 h and 2 h irradiation, respectively. Two products of oxidation are formed and their proportions increase with irradiation time.

### IV-DPIBF and oxidation products leakage outside LNCs

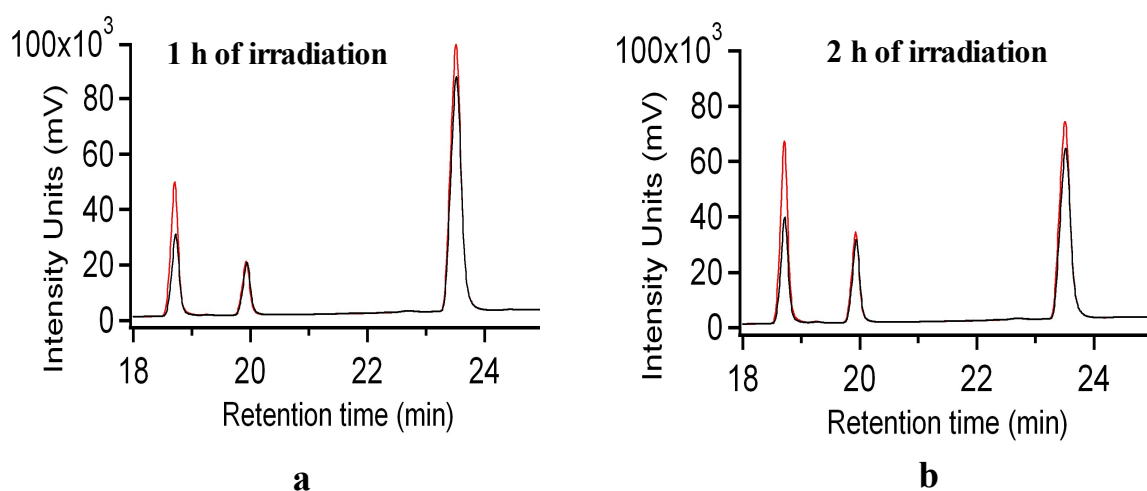

Fig.S3.HPLC chromatograms of DPIBF-loaded LNCs in  $D_2O$  for  $f_{LNC}=0.006$  with  $[T_0]=120 \times 10^{-6} \text{ mol.L}^{-1}$  after 1 h (a) or 2 h (b) 1270 nm irradiation at 1.0 W (detection at 215 nm). Irradiated dispersions (red line) and filtrated dispersions (black line) of LNCs have been analysed. Approximately 90% of DPIBF is found inside LNCs after 1 h or 2 h irradiation. The most hydrophobic oxidation product is found predominantly inside LNCs (at 95%). The most hydrophilic one is found at 60% inside LNCs.

## Part B-Solutions of RTC in D<sub>2</sub>O

### V-Effect of oxidation product on <sup>1</sup>O<sub>2</sub> production rate

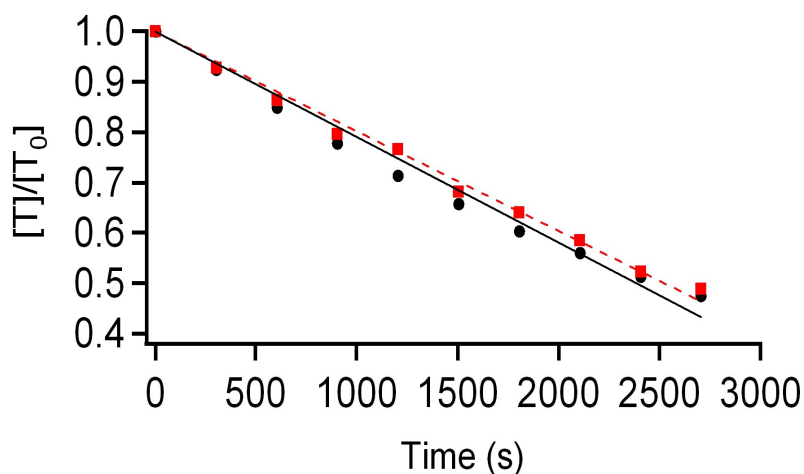

Fig S4. Normalized RTC concentration in D<sub>2</sub>O saturated with oxygen with  $[T_0]=100 \times 10^{-6} \text{ mol.L}^{-1}$  upon 1270 nm irradiation experiment at 1.1 W (red squares). Once all RTC has been degraded, the same amount of RTC is newly dissolved in the solution containing the oxidation products. Then this solution is irradiated a second time at the same IR power (black circles). The slopes of the curve are  $1.98 \times 10^{-4} \text{ s}^{-1} \pm 2\%$  compared to  $2.1 \times 10^{-4} \text{ s}^{-1} \pm 2\%$  for the first and the second experiment, respectively.

### VI-Effect of dissolved oxygen concentration on <sup>1</sup>O<sub>2</sub> production rate

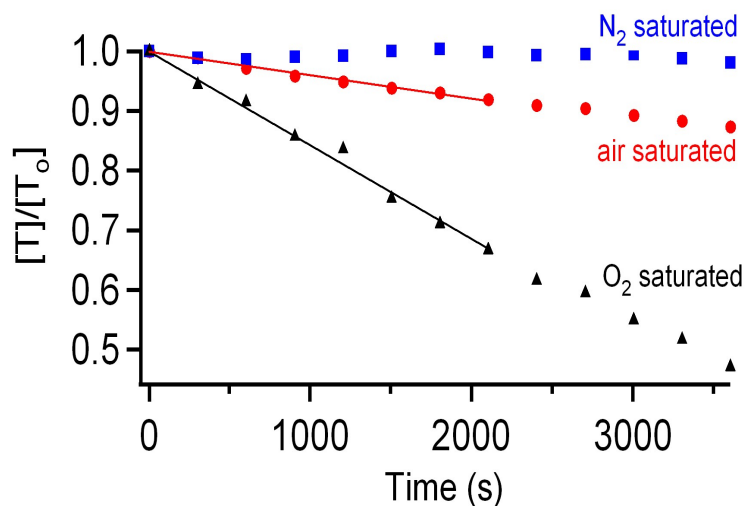

Fig S5. Normalized RTC concentrations in D<sub>2</sub>O with  $[T_0]=105 \times 10^{-6} \text{ mol.L}^{-1}$  saturated with air (red circles), oxygen (black triangles) and nitrogen (blue squares) have been irradiated at 1270 nm at the power of 1.0 W. No RTC disappearance is observed for the solution saturated with N<sub>2</sub>. Singlet oxygen production rates are  $6.76 \times 10^{-9} \text{ M}^{-1} \cdot \text{s}^{-1}$  and  $3.43 \times 10^{-8} \text{ M}^{-1} \cdot \text{s}^{-1}$  in solutions saturated with air and oxygen respectively, then <sup>1</sup>O<sub>2</sub> production rate is increased by  $\sim 5$  when the solution is saturated with oxygen.
